# Supplementary material for: Health information technology to improve care for people with multiple chronic conditions
Source: PubMed Central journal article supplement — Health Serv Res. 2021 Oct 5;56(Suppl 1):1006–36. doi: 10.1111/1475-6773.13860 (PMC8515226; doi:10.1111/1475-6773.13860), 2021-10-05
Supplement: HESR-56-1006-s001.pdf [file HESR-56-1006-s001.pdf]

## Appendix 1

### Literature search strategy

Since the MeSH indexing around the concept of multiple morbidity is not very well defined and our scope includes a wide range of HIT tools, a broad keyword strategy was employed to supplement the MeSH subject heading search strategy. We search for three concepts: multiple chronic conditions, medical informatics, and telemedicine. For the concept of multiple chronic conditions, we used the subject heading “comorbidity and chronic disease” and exploded on keywords listed below:

- multimorb\* or multi-morb\*
- multip\* adj2 (chronic\* or persist\* or long term or long standing or long lasting or incurab\* or constant\* or continual\* or continuing or perpetual\* or linger\* or incessan\* or unceas\*) adj3 (diseas\* or disorder\* or condition\* or afflict\* or suffer\* or incur\* or occur\*) or (multiple adj (morbid\* or comorbid\*))
- multip\* adj3 (diseas\* or disorder\* or condition\* or afflict\* or suffer\* or incur\* or occur\*)
- comorbid\* or co-morbid\*

For the concept of health informatics, we used the subject heading “medical informatics” and exploded on keywords listed below:

- ehealth or mhealth or e-health or m-health
- online or internet or (web adj bas\*) or synchron\* or realtime or real-time or video\* or remot\* or virtual\*) adj7 (monitor\* or gather\* or collect\* or extract\* or captur\* or interact\* or convers\* or talk\*)
- health\* or medic\* adj3 information\* adj5 (tech\* or comput\* or electronic\* or digital\* or internet\* or web-bas\* or smartphone\* or app or apps or application\*)
- (health\* or medic\*) adj3 (information\* or data\* or record\* or communicat\* or document\* or interact\*) adj5 (tech\* or comput\* or electronic\* or digital\* or internet\* or web-bas\* or smartphone\* or app or apps or application\*)

For the concept of telemonitoring, we used the subject heading “telemedicine” and exploded on keywords listed below:

- telemed\*
- online or internet or (web adj bas\*)
- synchron\* or realtime or real-time or video\*

The search strings for these three concepts were combined to retrieve the final search set.
